# Supplementary material for: Novel heterostructures by stacking layered molybdenum disulfides and nitrides for solar energy conversion
Source: Royal Society of Chemistry journal article supplement (doi:10.1039/c4ta03134b), 2014-01-01
Supplement: c4ta03134b1.pdf [file c4ta03134b1.pdf]

## Supplementary Information

### Novel heterostructures by stacking layered molybdenum disulfides and nitrides for solar energy conversion

Hui Zhang<sup>a</sup>, Yanning Zhang<sup>a,b</sup>, Hao Liu<sup>b</sup>, Li-Min Liu<sup>a\*</sup>

<sup>a</sup>Beijing Computational Science Research Center, Beijing 100084, China.

<sup>b</sup>Chengdu Green Energy and Green Manufacturing Technology R&D Center, Chengdu, Sichuan, 610207, China

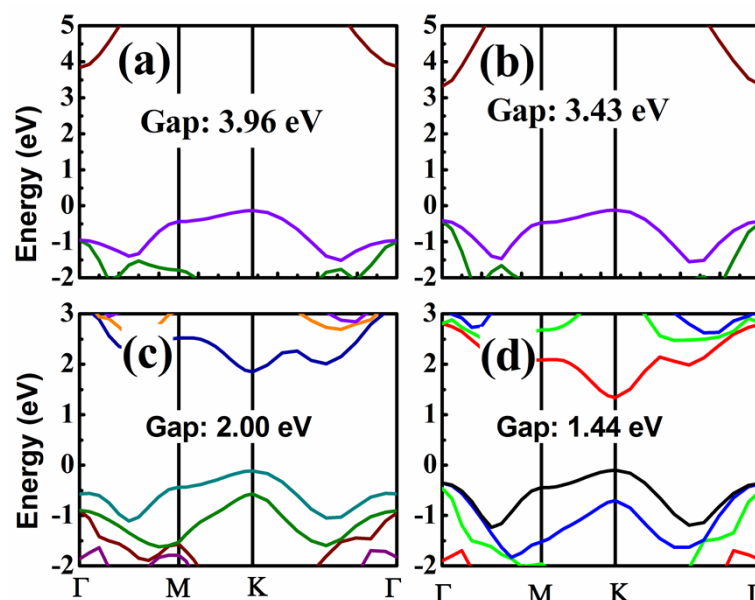

**Fig. S1** The band structures of monolayers and bilayer heterostructures calculated with HSE06: (a) g-AlN, (b) g-GaN, (c) MoS<sub>2</sub>/g-AlN, (d) MoS<sub>2</sub>/g-GaN.

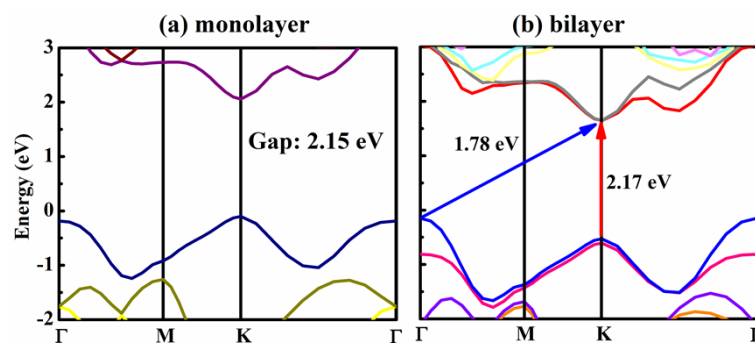

**Fig. S2** The electronic structures of (a) monolayer and (b) bilayer MoS<sub>2</sub>, calculated with HSE06.
